# Supplementary material
Source: PubMed Central journal article supplement (PMC5559310)
Supplement: NIHMS872176-supplement-1.pdf [file NIHMS872176-supplement-1.pdf]

## **Supplementary Information**

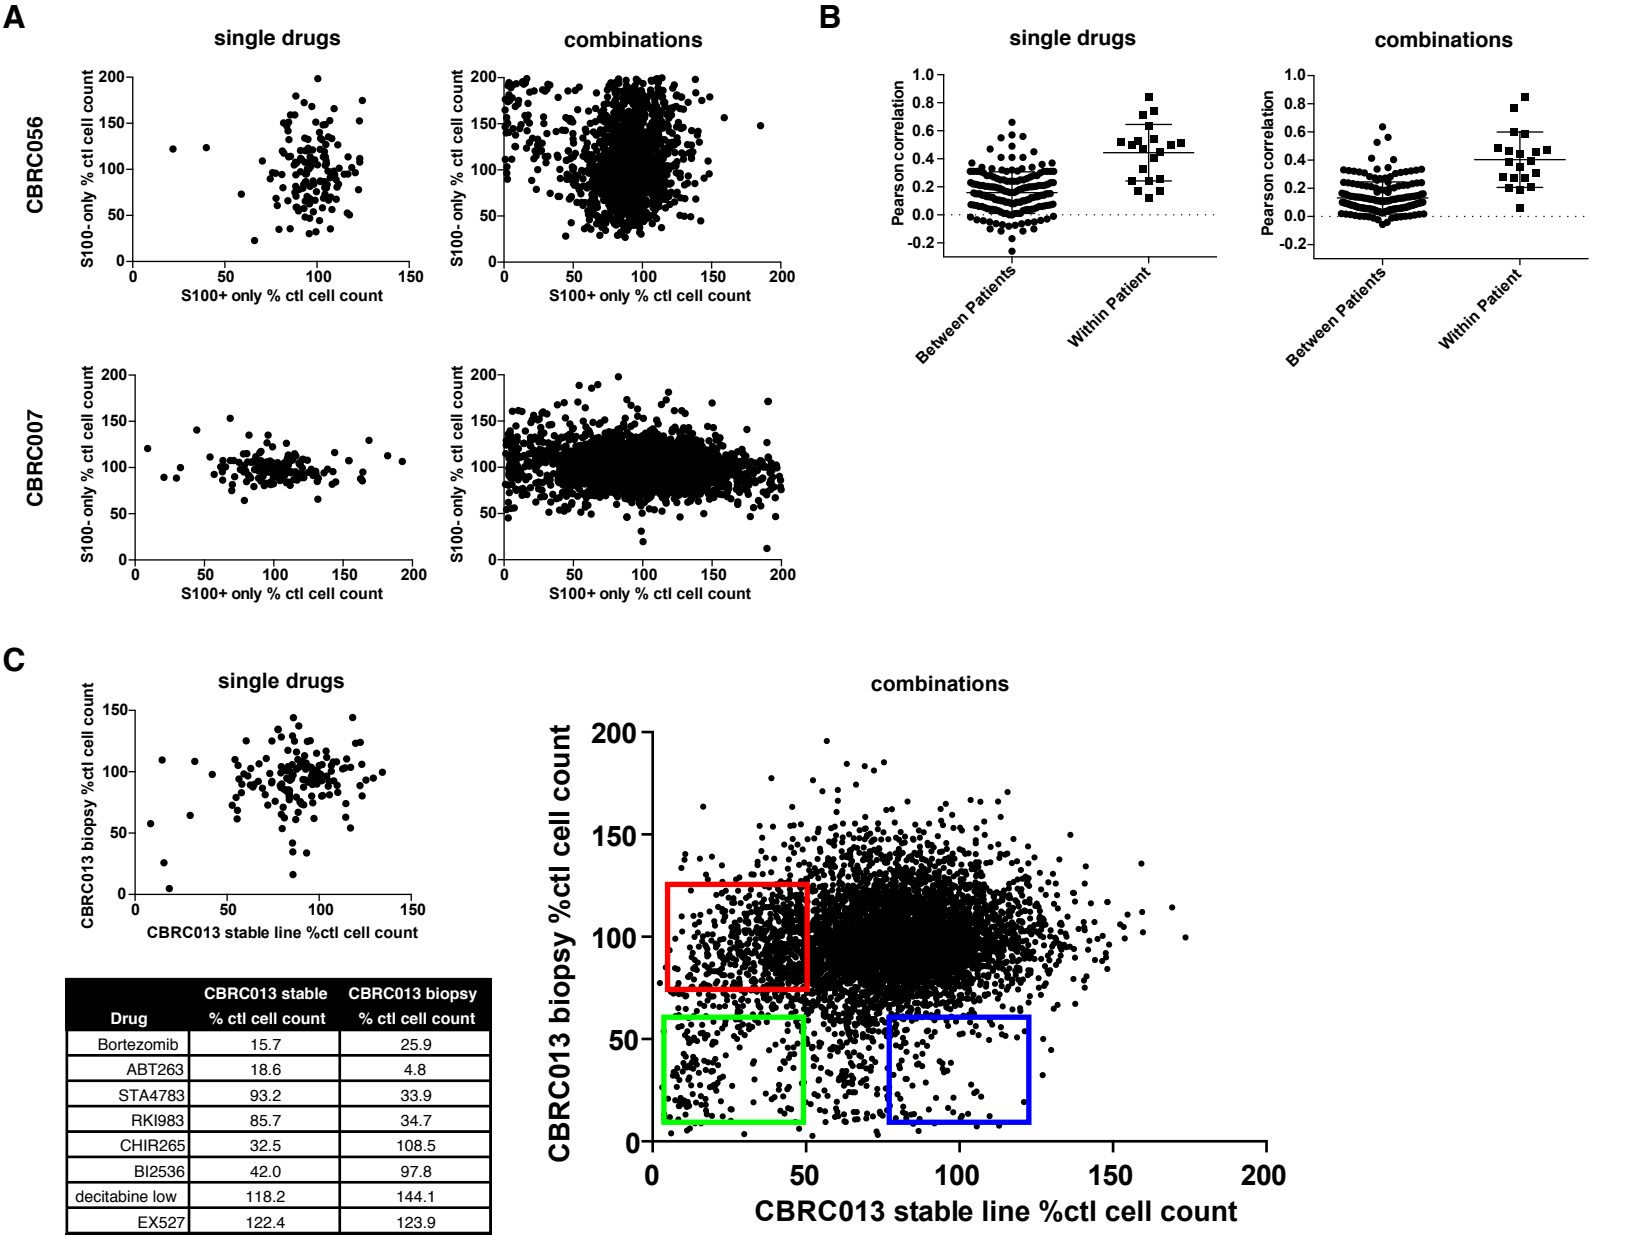

**Supplementary Figure 1.** A, Comparison of single (left) and combination (right) drug effects in two primary patient biopsies, CBRC056 (top) and CBRC007 (bottom). No correlation was seen between effects in the melanoma population (S100+) and non-melanoma stroma population (S100-). B, Pearson correlation coefficients for single (left) or combinatorial (right) drug effects between different patient samples or within patient samples when replicates were technically possible. C, Comparison of drug effects in a stable short-term culture derived from patient biopsy CBRC013 around passage 10 compared to the primary patient biopsy. Single drug effects are shown at left and in table below, showing some drugs had similar effects in both the biopsy and stable cell-line but others diverged. Similarly, for combination drugs (plot at right), combinations either affected both primary and stable cells (green box), only the primary biopsy (blue box), or only the stable cell line (red box).

**A**

| Rank | Drug 1            | Drug 2             |
|------|-------------------|--------------------|
| 1    | STA4783           | Tamatinib/R406     |
| 2    | vorinostat/SAHA   | STA4783            |
| 3    | sunitinib         | STA4783            |
| 4    | STA4783           | IPA3               |
| 5    | STA4783           | fingolimid         |
| 6    | Bortezomib        | BMS536924          |
| 7    | STA4783           | Veliparib/ABT888   |
| 8    | Tamatinib/R406    | fingolimid         |
| 9    | STA4783           | CX4945             |
| 10   | STA4783           | everolimus         |
| 11   | NVP-BEZ235        | BMS536924          |
| 12   | fingolimid        | Bortezomib         |
| 13   | XL147             | Tamatinib/R406     |
| 14   | STA4783           | NVP-BEZ235         |
| 15   | sorafenib         | bivanib/BI2536     |
| 16   | sunitinib         | Bortezomib         |
| 17   | STA4783           | Dovitinib/CHIR-258 |
| 18   | OSI906            | fingolimid         |
| 19   | sunitinib         | Tamatinib/R406     |
| 20   | Tideglusib/TZDZ-8 | STA4783            |

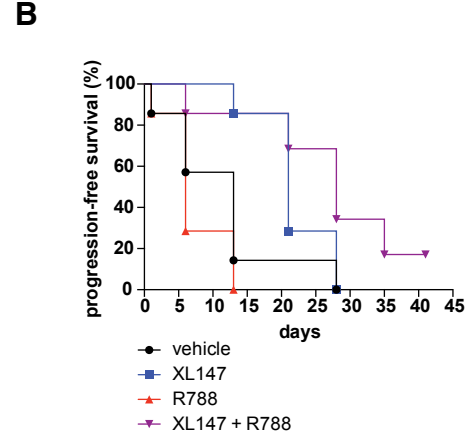

**C**

| Rank | Drug 1           | Drug 2     |
|------|------------------|------------|
| 1    | Tamatinib/R406   | Perifosine |
| 2    | Tozasertib/VX680 | dasatanib  |
| 3    | Perifosine       | fingolimid |
| 4    | FK866            | cisplatin  |
| 5    | sorafenib        | decitabine |
| 6    | Tozasertib/VX680 | sorafenib  |
| 7    | OSI906           | cisplatin  |
| 8    | STA4783          | Perifosine |
| 9    | IMD0354          | cisplatin  |
| 10   | MK2206           | FK866      |
| 11   | JNK5a            | STA4783    |
| 12   | nilutamide       | FK866      |
| 13   | FK866            | Bortezomib |
| 14   | decitabine       | Bortezomib |
| 15   | PF562271         | SNS-032    |
| 16   | STA4783          | PF04217903 |
| 17   | decitabine       | dasatanib  |
| 18   | decitabine       | ABT263     |
| 19   | sorafenib        | SNS-032    |
| 20   | IMD0354          | ENMD2076   |

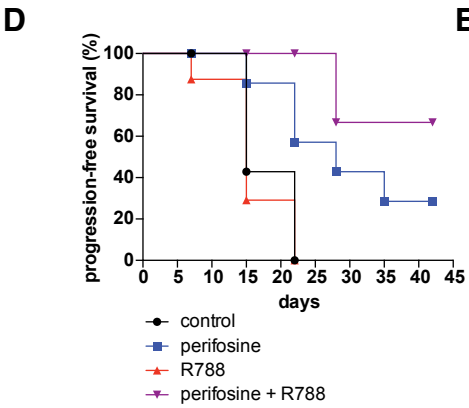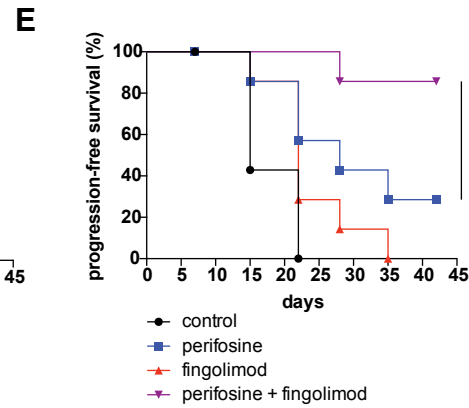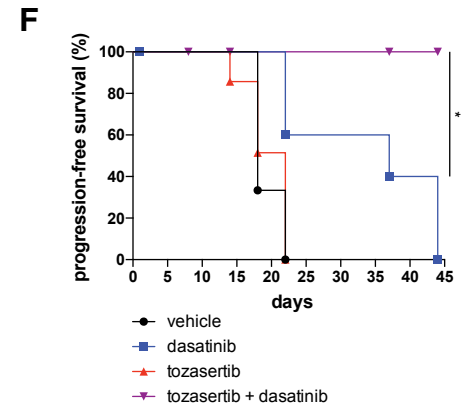

**Supplementary Figure 2.** A, Biopsy CBRC013 top 20 drug combinations by *ex vivo* screening algorithm. B, Progression (growth beyond 300mm<sup>3</sup>) free survival of CBRC013 xenografts showed a trend towards increased PFS with the R788 and XL147 combination compared to XL147 alone ( $P = 0.1$ , log-rank test). C, Biopsy CBRC029 top 20 drug combinations by *ex vivo* screening algorithm. D, Progression (growth beyond 1000mm<sup>3</sup>) free survival of CBRC029 xenografts showed a trend towards increased PFS of the perifosine and R788 combination-treated animals compared to only perifosine-treated animals ( $P = 0.2$ , log-rank test). E, Progression (growth beyond 1000mm<sup>3</sup>) free survival of CBRC029 xenografts. F, Progression (growth beyond 1500mm<sup>3</sup>) free survival of CBRC029 xenografts.

A

| Rank | Drug 1               | Drug 2          |
|------|----------------------|-----------------|
| 1    | vatalanib/PTK787     | Bortezomib      |
| 2    | PF562271             | Bortezomib      |
| 3    | FK866                | ABT263          |
| 4    | decitabine           | Bortezomib      |
| 5    | palbociclib/PD332991 | erlotinib       |
| 6    | Midostaurin/PKC412   | Perifosine      |
| 7    | vorinostat/SAHA      | Enzastaurin     |
| 8    | NVP-BEZ235           | everolimus      |
| 9    | VX702                | vorinostat/SAHA |
| 10   | OSI906               | dasatanib       |
| 11   | Tideglusib/TZDZ-8    | ABT263          |
| 12   | YM155                | STA4783         |
| 13   | JNK5a                | dasatanib       |
| 14   | MK2206               | everolimus      |
| 15   | Indole-3-carbinol    | ABT263          |
| 16   | Midostaurin/PKC412   | OSI906          |
| 17   | vorinostat/SAHA      | everolimus      |
| 18   | PF04217903           | Perifosine      |
| 19   | vincristine          | dasatanib       |
| 20   | STA4783              | Darinaparsin    |

B

| Rank | Drug 1      | Drug 2              |
|------|-------------|---------------------|
| 1    | FK866       | ABT263              |
| 2    | Bortezomib  | CX4945              |
| 3    | Bortezomib  | vatalanib/PTK787    |
| 4    | FK866       | decitabine          |
| 5    | Bortezomib  | temozolomide        |
| 6    | Perifosine  | PF04217903          |
| 7    | Perifosine  | Tamatinib/R406      |
| 8    | FK866       | RK1983              |
| 9    | NVP-BEZ235  | Bortezomib          |
| 10   | FK866       | ENMD2076            |
| 11   | FK866       | Midostaurin/PKC412  |
| 12   | Bortezomib  | decitabine          |
| 13   | Perifosine  | Midostaurin/PKC412  |
| 14   | Perifosine  | nilutamide          |
| 15   | Bortezomib  | SNS-032             |
| 16   | FK866       | PF562271            |
| 17   | Bortezomib  | Tanespimycin/17-AAG |
| 18   | ruxolitinib | FK866               |
| 19   | FK866       | SNS-032             |
| 20   | FK866       | Dovitinib/CHIR-258  |

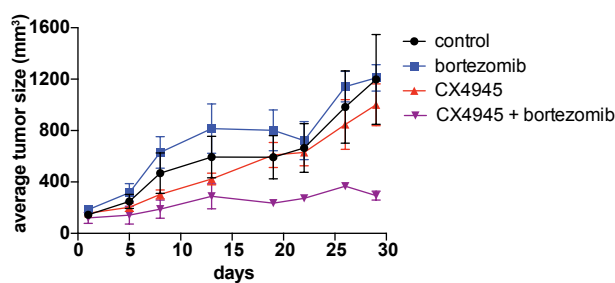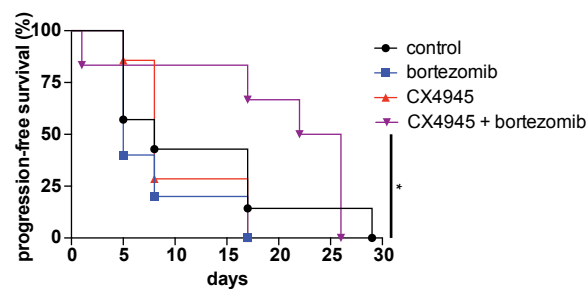

C

| Rank | Drug 1            | Drug 2               |
|------|-------------------|----------------------|
| 1    | YM155             | STA4783              |
| 2    | ruxolitinib       | FK866                |
| 3    | STA4783           | BI78D3               |
| 4    | Tozasertib/VX680  | BI78D3               |
| 5    | FK866             | SNS-032              |
| 6    | STA4783           | palbociclib/PD332991 |
| 7    | OSU03012          | gemcitabine          |
| 8    | YM155             | SNS314               |
| 9    | OSI906            | BI78D3               |
| 10   | ingolimod         | FK866                |
| 11   | Tozasertib/VX680  | dasatanib            |
| 12   | YM155             | lapatinib            |
| 13   | FK866             | cisplatin            |
| 14   | YM155             | Perifosine           |
| 15   | YM155             | PF04217903           |
| 16   | Indole-3-carbinol | ruxolitinib          |
| 17   | ZM336372          | BI78D3               |
| 18   | FK866             | ABT263               |
| 19   | gemcitabine       | BI78D3               |
| 20   | RK1983            | FK866                |

| Rank | Drug 1  | Drug 2               |
|------|---------|----------------------|
| 349  | PLX4720 | YM155                |
| 681  | PLX4720 | etoposide            |
| 690  | PLX4720 | Dovitinib/CHIR-258   |
| 697  | PLX4720 | JNK5a                |
| 719  | PLX4720 | Perifosine           |
| 848  | PLX4720 | Crizotinib/PF2341066 |
| 853  | PLX4720 | ABT263               |
| 873  | PLX4720 | PF04217903           |

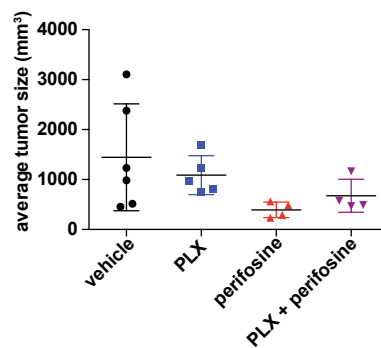**Response**

|                   |      |     |      |     |
|-------------------|------|-----|------|-----|
| <b>In vivo:</b>   | 100% | 75% | 27%  | 47% |
| <b>Ex vivo:</b>   | 100% | 57% | 119% | 71% |
| <b>(low dose)</b> | 100% | 59% | 130% | 73% |

**Supplementary Figure 3.** A, Biopsy CBRC056 top 20 drug combinations by *ex vivo* screening algorithm. B, (left) Biopsy CBRC056 top 20 drug combinations by alternate screening algorithm. (middle) Average CBRC056 tumor sizes in animals treated with bortezomib, CX4945, or both ( $N = 8$ ). Values are shown as mean  $\pm$  S.E.M. ranges. (right) Progression (growth beyond  $300\text{mm}^3$ ) free survival of CBRC056 xenografts. C, (left) Biopsy CBRC058 top 20 drug combinations by *ex vivo* screening algorithm. (right) CBRC058 PDX tumor sizes after four weeks of treatment. There was no significant difference in tumor sizes between animals treated with perifosine alone or perifosine in combination with PLX4720. (bottom) Top drug combinations containing PLX4720 by *ex vivo* screening algorithm.

**A**

| Rank | Drug 1            | Drug 2              |
|------|-------------------|---------------------|
| 1    | BI78D3            | CX4945              |
| 2    | Bortezomib        | dasatinib           |
| 3    | BI78D3            | decitabine          |
| 4    | BI78D3            | EX527               |
| 5    | fingolimod        | Tanespimycin/17-AAG |
| 6    | fingolimod        | AZD7762             |
| 7    | fingolimod        | SNS-032             |
| 8    | IPA3              | CP690550            |
| 9    | Indole-3-carbinol | IPA3                |
| 10   | fingolimod        | lenalidomide        |
| 11   | BI78D3            | NVP-BEZ235          |
| 12   | BI78D3            | OSI906              |
| 13   | Perifosine        | nilutamide          |
| 14   | PLX4720           | cediranib/AZD2171   |
| 15   | RK1983            | PF04217903          |
| 16   | BI78D3            | STA4783             |
| 17   | CX4945            | STA4783             |
| 18   | BI78D3            | JNK5a               |
| 19   | Bortezomib        | JNK5a               |
| 20   | BI78D3            | Tideglusib/TZDZ-8   |

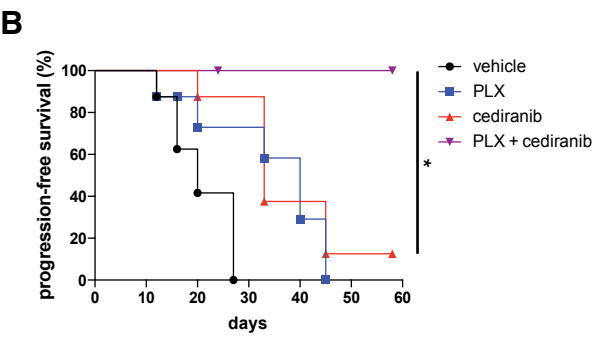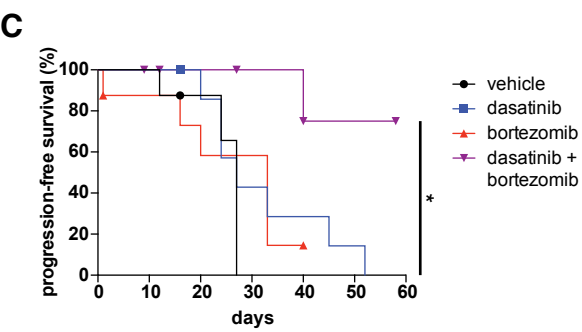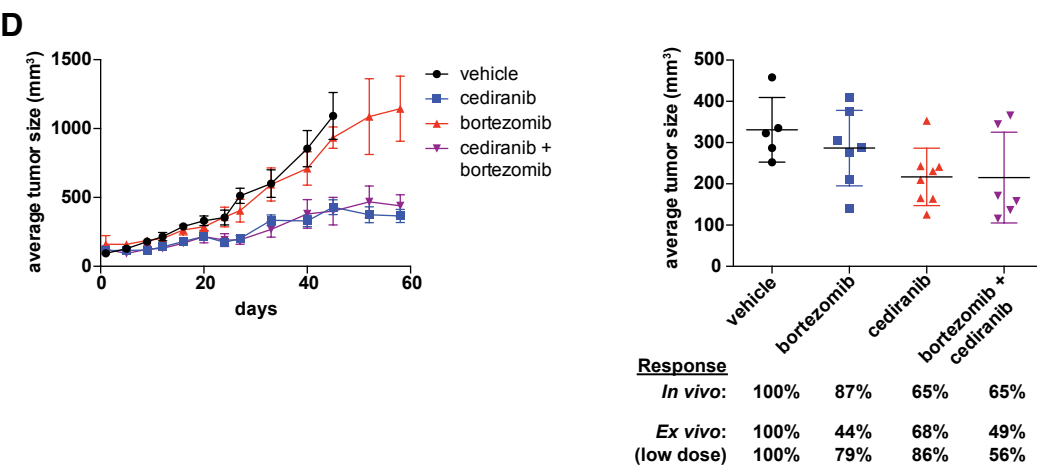



**Supplementary Figure 4.** A, Biopsy CBRC026 top 20 drug combinations by *ex vivo* screening algorithm. B, Progression (growth beyond 300mm<sup>3</sup>) free survival of animals with CBRC026 xenografts. C, Progression (growth beyond 350mm<sup>3</sup>) free survival of animals with CBRC026 xenografts. D, Effects of cediranib and bortezomib combination on PDX tumor size. (left) Average tumor sizes in animals treated with cediranib, bortezomib, or both (*N* = 7-8). Values are shown as mean +/- S.E.M. ranges. (right) CBRC026 PDX tumor sizes after three weeks of treatment.

**A**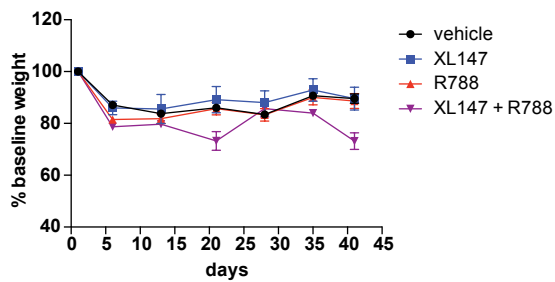**B**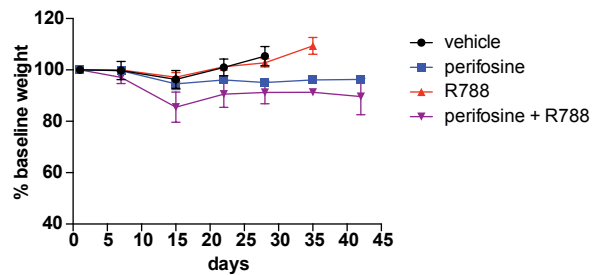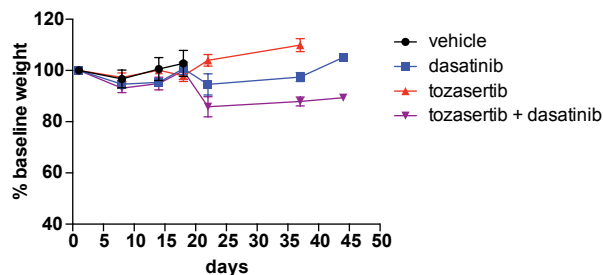**C**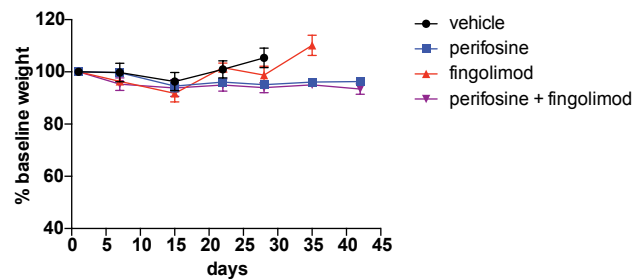**D**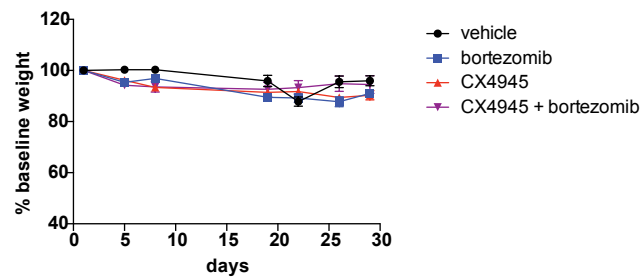**E**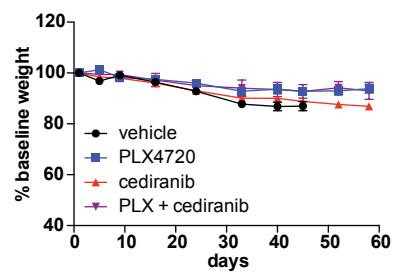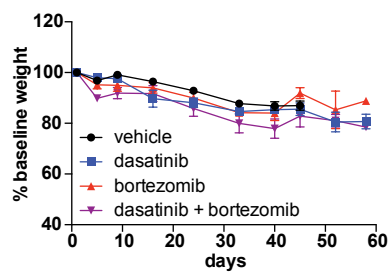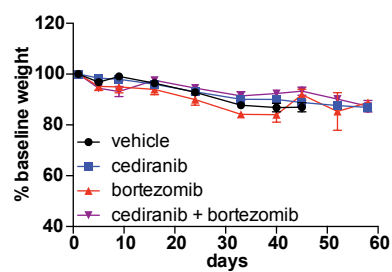

**Supplementary Figure 5.** A, Weights for animals bearing CBRC013 xenografts. XL147 and R788 combination decreased animal weight by three weeks of continuous dosing compared to R788 alone (Two-way ANOVA with repeated measures, with Tukey's correction). B, Weights for animals bearing CBRC029 xenografts. (left) Co-dosing perifosine and R788 decreased animal weights compared to perifosine alone after four weeks of continuous treatment (Two-way ANOVA with repeated measures, with Tukey's correction). (Right) The combination of tozasertib and dasatinib resulted in decreased animal weights compared to dasatinib alone after five weeks of continuous dosing (Two-way ANOVA with repeated measures, with Tukey's correction). C, Addition of fingolimod to perifosine did not further decrease weights of CBRC029 xenograft bearing animals. D, Weights for animals bearing CBRC056 xenografts. There was no significant difference in animal weights between treatment groups. E, Weights for animals bearing CBRC026 xenografts. There was no significant difference in animal weights between treatment groups in all three experiments. Values are shown as mean +/- S.E.M. ranges.

**Supplementary Table 1.** Screening results for drug combinations, expressed as percent of control (DMSO-treated) values.
